# Supplementary material for: Development of AEI type germanoaluminophosphate (GeAPO-18) with ultra-weak acid sites and its catalytic properties for the methanol to olefin (MTO) reaction
Source: Royal Society of Chemistry journal article supplement (doi:10.1039/c7cy01153a), 2017-01-01
Supplement: c7cy01153a1.pdf [file c7cy01153a1.pdf]

## Development of AEI type germanoaluminophosphate (GeAPO-18) with ultra-weak acid sites and its catalytic properties on methanol to olefins (MTO) reactions

Kaito Ono,<sup>a</sup> Koji Miyake,<sup>\*a</sup> Masahiro Nakai,<sup>a</sup> Hasna Al Jabri,<sup>a</sup> Yuichiro Hirota,<sup>a</sup> Yoshiaki Uchida,<sup>a</sup> Shunsuke Tanaka,<sup>b</sup> Manabu Miyamoto<sup>c</sup> and Norikazu Nishiyama<sup>a</sup>

a) Division of Chemical Engineering, Graduate School of Engineering Science, Osaka University, 1-3 Machikaneyama, Toyonaka, Osaka 560-8531, Japan

b) Department of Chemical, Energy and Environmental Engineering, Kansai University, 3-3-35 Yamate, Suita, Japan.

c) Department of Chemistry and Biomolecular Science, Gifu University, 1-1 Yanagido, Gifu 501-1193, Japan

[k.ono@cheng.es.osaka-u.ac.jp](mailto:k.ono@cheng.es.osaka-u.ac.jp) / [kojimiya@cheng.es.osaka-u.ac.jp](mailto:kojimiya@cheng.es.osaka-u.ac.jp).

### Experimental

The synthesis of AlPO-5

AlPO-5 was prepared using triethylamine (TEA) as the template. Typically, 7.8 g Al(OH)<sub>3</sub> (50% Al<sub>2</sub>O<sub>3</sub>, Aldrich) was stirred with 22.3 g deionized water for 30 min. 8.8 g of phosphoric acid (85% H<sub>3</sub>PO<sub>4</sub>) was added drop-wise and the mixture was stirred for 90 min. 3.87 g of TEAOH (Aldrich) was added drop-wise and the gel was aged with stirring for 120 min. The composition of this mixture was 0.1 Al(OH)<sub>3</sub>: 0.08 (H<sub>3</sub>PO<sub>4</sub>): 0.04 TEAOH: 1.24 H<sub>2</sub>O. The gels were divided into several Teflon bottles, placed inside stainless steel autoclaves, and heated in an oven at 453 K for 24 h. The resultant powder was washed with deionized water and dried at 363 K. To remove TEA cations, the obtained powder was calcined under air at 823 K for 5 h.

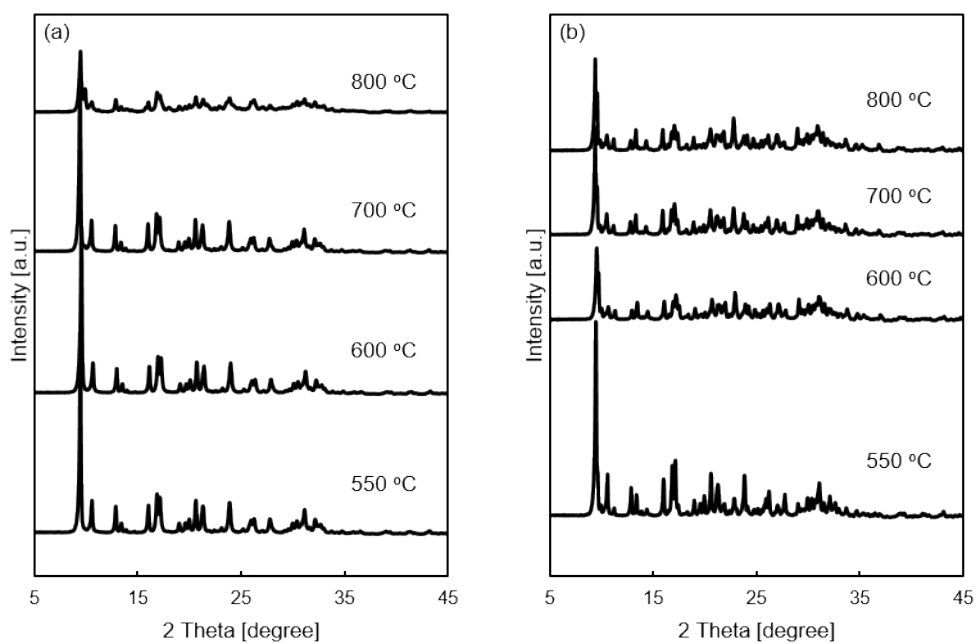

Fig. S1 The patterns of XRD of SAPO-18 (a) and GeAPO-18 (b) with different calcination temperature.

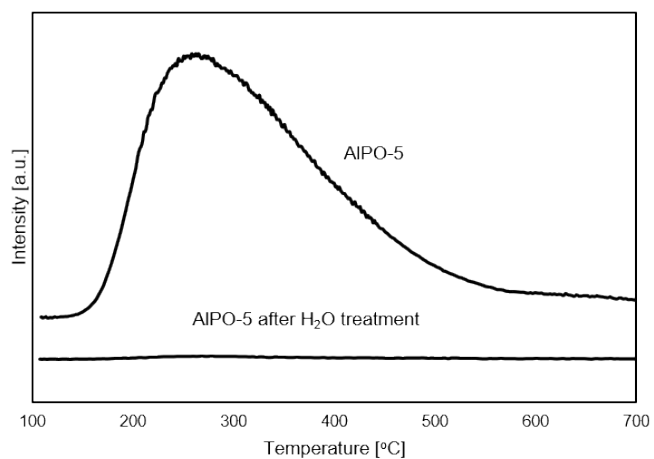

Fig. S2 The NH<sub>3</sub>-TPD spectra of AIPO-5 and AIPO-5 after H<sub>2</sub>O treatment.
